# Supplementary material
Source: HighWire-hosted journal article supplement (http://www.qdcxjkg.com/highwire/filestream/114466/field_highwire_adjunct_files/0/coi_disclosure_Pison.pdf)
Supplement: coi_disclosure_Pison.pdf [file coi_disclosure_Pison.pdf]

Avertissement : ce formulaire n'est pas pris en charge par la version actuelle d'Acrobat ou d'Adobe Reader.  
Mise à niveau vers la dernière version pour une prise en charge complète.
